# Supplementary material for: Transcriptome comparison reveals a genetic network regulating the lower temperature limit in fish
Source: PubMed Central journal article supplement (PMC4928090; doi:10.1038/srep28952), 2016-06-30
Supplement: srep28952-s1.pdf [file srep28952-s1.pdf]

# **Transcriptome comparison reveals a genetic network regulating the lower temperature limit in fish**

Peng Hu<sup>1</sup>, Mingli Liu<sup>1</sup>, Yimeng Liu<sup>1</sup>, Jinfeng Wang<sup>1</sup>, Dong Zhang<sup>1</sup>, Hongbo Niu<sup>1</sup>, Shouwen Jiang<sup>1</sup>, Jian Wang<sup>1</sup>, Dongsheng Zhang<sup>1</sup>, Bingshe Han<sup>1</sup>, Qianghua Xu<sup>2</sup>, and Liangbiao Chen<sup>1,\*</sup>

<sup>1</sup>Key Laboratory of Aquacultural Resources and Utilization, Ministry of Education, College of Fisheries and Life Sciences, Shanghai Ocean University, Shanghai, 201306, China

<sup>2</sup>Key Laboratory of Sustainable Exploitation of Oceanic Fisheries Resources, Ministry of Education, College of Marine Sciences, Shanghai Ocean University, Shanghai, 201306, China

\* Correspondence: Liangbiao Chen, Shanghai Ocean University, 999 Huchenghuan Road, Lingang New City, Shanghai 201306, P.R. China. E-mail: [lbchen@shou.edu.cn](mailto:lbchen@shou.edu.cn)

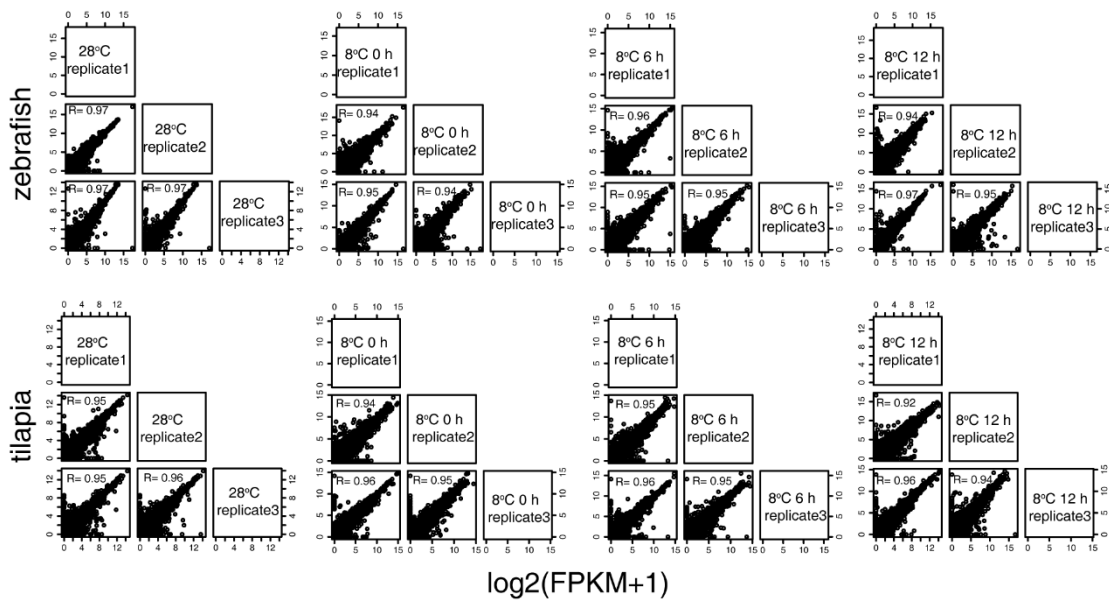

**Figure S1. Scatter plot showing gene expression value (FPKM) between biological replicates. Pearson correlation coefficient ( $R$ ) is indicated.**

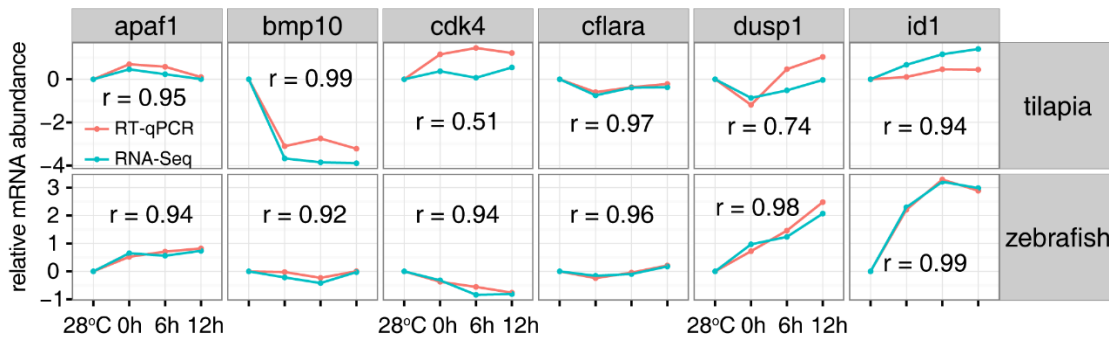

**Figure S2. The expression patterns of 6 genes under cold treatments measured by RT-qPCR in comparison with those deduced from the RNA-seq results. The Pearson correlation coefficient ( $r$ ) between RT-qPCR and RNA-seq was indicated.**

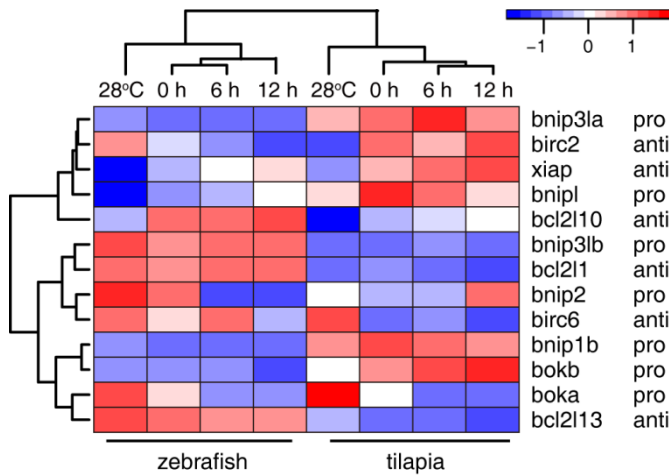

**Fig. S3 Clustering analysis of changes in gene expression for apoptosis-related genes in the zebrafish and tilapia transcriptome. Genes that were assigned to anti-apoptosis and pro-apoptosis, which was indicated in the right. The colors represents relative expression changes. The dendrograms represent the differences of gene expression at each time point.**

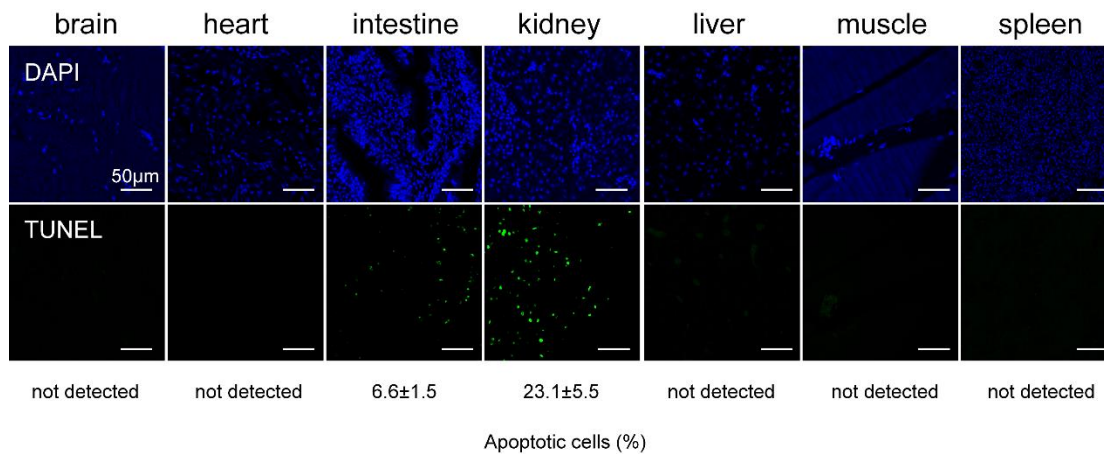

**Figure S4. Apoptosis analysis of other 7 tissues at 8°C/12 h by TUNEL. The nucleus was counterstained with DAPI. Scale bar is 50 μm. The proportion apoptotic cells (Mean ± SD) is indicated in the below and are based on at least three biological replicates, with each replicate having at least 3 individuals.**

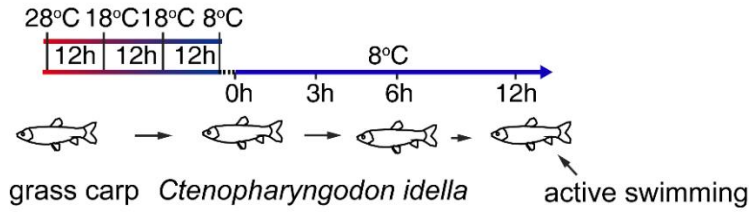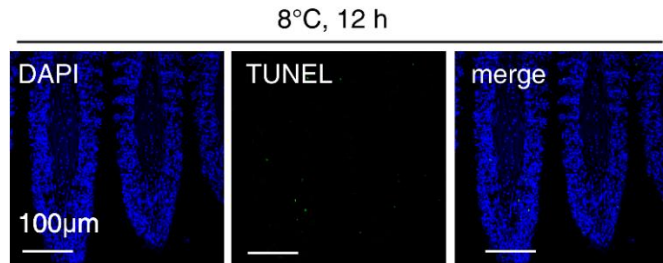

**Figure S5. Apoptosis analysis of grass carp *Ctenopharyngodon idella* gill at 8°C/12 h by TUNEL. The nucleus was counterstained with DAPI. Scale bar is 100 µm.**

**Table S1. The numbers of raw, clean and mapped RNA-seq reads from each sample.**

| Group | replicate  | species   | condition | raw reads   | trimmed reads | mapped reads |
|-------|------------|-----------|-----------|-------------|---------------|--------------|
| 1     | 1          | tilapia   | 28°C      | 11,941,194  | 10,530,042    | 8,044,543    |
| 1     | 2          | tilapia   | 28°C      | 14,131,725  | 12,499,448    | 9,409,733    |
| 1     | 3          | tilapia   | 28°C      | 14,295,169  | 12,576,255    | 9,660,826    |
| 2     | 1          | tilapia   | 8°C/0 h   | 15,675,972  | 13,806,819    | 10,653,212   |
| 2     | 2          | tilapia   | 8°C/0 h   | 13,427,850  | 11,703,436    | 9,119,121    |
| 2     | 3          | tilapia   | 8°C/0 h   | 9,028,886   | 8,222,948     | 6,337,739    |
| 3     | 1          | tilapia   | 8°C/6 h   | 17,026,820  | 15,058,697    | 11,876,697   |
| 3     | 2          | tilapia   | 8°C/6 h   | 14,856,128  | 12,806,119    | 9,777,828    |
| 3     | 3          | tilapia   | 8°C/6 h   | 11,062,991  | 9,796,104     | 7,873,444    |
| 4     | 1          | tilapia   | 8°C/12 h  | 15,215,259  | 13,141,915    | 10,381,896   |
| 4     | 2          | tilapia   | 8°C/12 h  | 12,426,254  | 10,826,850    | 8,602,261    |
| 4     | 3          | tilapia   | 8°C/12 h  | 13,247,555  | 12,048,912    | 9,243,886    |
| 5     | 1          | zebrafish | 28°C      | 13,155,052  | 11,152,742    | 8,819,536    |
| 5     | 2          | zebrafish | 28°C      | 12,023,477  | 10,697,001    | 8,384,085    |
| 5     | 3          | zebrafish | 28°C      | 14,927,030  | 13,190,698    | 10,327,914   |
| 6     | 1          | zebrafish | 8°C/0 h   | 15,437,052  | 13,625,528    | 10,843,720   |
| 6     | 2          | zebrafish | 8°C/0 h   | 15,202,780  | 13,494,226    | 10,765,579   |
| 6     | 3          | zebrafish | 8°C/0 h   | 12,192,505  | 11,178,979    | 8,979,117    |
| 7     | 1          | zebrafish | 8°C/6 h   | 14,713,329  | 13,017,569    | 10,639,129   |
| 7     | 2          | zebrafish | 8°C/6 h   | 14,692,433  | 12,781,203    | 10,378,855   |
| 7     | 3          | zebrafish | 8°C/6 h   | 15,122,071  | 13,106,798    | 10,984,988   |
| 8     | 1          | zebrafish | 8°C/12 h  | 12,886,557  | 11,377,284    | 9,021,792    |
| 8     | 2          | zebrafish | 8°C/12 h  | 15,751,804  | 13,459,976    | 10,488,727   |
| 8     | 3          | zebrafish | 8°C/12 h  | 16,793,025  | 14,594,684    | 12,146,405   |
| Total | 24 samples |           |           | 335,232,918 | 294,694,233   | 232,761,033  |

**Table S2. List of cold-responsive genes (see Dataset 1)****Table S3. List of zebrafish/tilapia divergently expressed genes (see Dataset 2)****Table S4. Enrichment analysis of TFBS in promoters of zebrafish/tilapia divergently expressed genes within the metabolic pathways, insulin signaling pathway, and foxo signaling pathway.**

| TF        | divergently expressed |        | non divergently expressed |        | Odds Ratio | Pvalue   | Pathway                   |
|-----------|-----------------------|--------|---------------------------|--------|------------|----------|---------------------------|
|           | orthologues           |        | orthologues               |        |            |          |                           |
|           | present               | absent | present                   | absent |            |          |                           |
| Spz1      | 11                    | 14     | 12                        | 62     | 3.99       | 1.17E-02 | Insulin signaling pathway |
| NKX3-1    | 12                    | 13     | 17                        | 57     | 3.06       | 2.32E-02 | Insulin signaling pathway |
| HNF4G     | 15                    | 10     | 25                        | 49     | 2.91       | 3.28E-02 | Insulin signaling pathway |
| Nobox     | 7                     | 18     | 7                         | 67     | 3.66       | 4.10E-02 | Insulin signaling pathway |
| RORA_1    | 12                    | 13     | 19                        | 55     | 2.64       | 4.76E-02 | Insulin signaling pathway |
| Bcl6      | 16                    | 14     | 18                        | 52     | 3.26       | 1.11E-02 | FoxO signaling pathway    |
| KLF5      | 21                    | 9      | 30                        | 40     | 3.08       | 1.65E-02 | FoxO signaling pathway    |
| JUND      | 17                    | 13     | 22                        | 48     | 2.82       | 2.51E-02 | FoxO signaling pathway    |
| Gfi1      | 102                   | 78     | 226                       | 296    | 1.71       | 2.38E-03 | Metabolic pathways        |
| NFE2::MAF | 84                    | 96     | 178                       | 344    | 1.69       | 3.16E-03 | Metabolic pathways        |
| Stat4     | 84                    | 96     | 180                       | 342    | 1.66       | 4.27E-03 | Metabolic pathways        |
| E2F6      | 62                    | 118    | 132                       | 390    | 1.55       | 2.04E-02 | Metabolic pathways        |
| STAT1     | 70                    | 110    | 155                       | 367    | 1.51       | 2.62E-02 | Metabolic pathways        |
| HINFP     | 27                    | 153    | 47                        | 475    | 1.78       | 3.38E-02 | Metabolic pathways        |

**Table S5. List of the primers used in this study**

| Gene   |         | zebrafish                | tilapia                  |
|--------|---------|--------------------------|--------------------------|
| bmp10  | Forward | GAGTTAGCATCTCGACAGGTTTAT | GACAACCCTAGAGGGCATAAAT   |
|        | Reverse | CGTGGTCCCATAGTCTGATTTT   | GCAGGATGGAGTATGTCAAGAA   |
| dusp1  | Forward | GCTGGGTTTGTTCGTTTCATC    | CTCAGAGTAGATGTGCCAGAAAAG |
|        | Reverse | CTCCAACATATCCCGAAGTGAG   | GGCTTCATGATGTCTCGTAAGG   |
| apaf1  | Forward | CATTTGTGGCTCTGGGATCT     | CGACAATATCGGCATCCTCTAC   |
|        | Reverse | GCAGTGGTGAACAGTCTTAGT    | GGCGTCTGTTTCTGTCTATCT    |
| cdk4   | Forward | AGGACGGATCAGGAGACTAAAG   | TTCACTCTAACCGCGTGATG     |
|        | Reverse | GCTGGAACCTTCTCCAGGTATG   | AGATCCTGGCAAGTCCAAAG     |
| cflara | Forward | CTCTCTGGGTCTGAAGGAAAC    | GATGTCCACCAGTATCTGAGTTC  |
|        | Reverse | TGATGAGGCAGCAGACAAAAG    | GATGCAGCACACAAAAGCTATC   |
| id1    | Forward | CTCGCTTCAGCTATTCTCTTT    | TGACAGGATCATGTGTCGTTAAG  |
|        | Reverse | CAACATCCTCTCCTCCAACCTT   | CTTGATGCGGTTTCGAGAAGT    |
| actb   | Forward | GATCTGGCATCACACCTTCTAC   | GATCTGGCATCACACCTTCTAC   |
|        | Reverse | TCTTCTCCCTGTTGGCTTTG     | TCTTCTCTGTTGGCTTTGG      |
